1 **A streamlined method for transposon mutagenesis of**  
2 ***Rickettsia parkeri* yields numerous mutations that**  
3 **impact infection**

4  
5 Rebecca L. Lamason<sup>1,#a,\*</sup>, Natasha M. Kafai<sup>1,#b</sup>, and Matthew D. Welch<sup>1\*</sup>

6  
7

8 <sup>1</sup> Department of Molecular and Cell Biology, University of California, Berkeley, Berkeley,  
9 CA

10 <sup>#a</sup> Current address: Department of Biology, Massachusetts Institute of Technology,  
11 Cambridge, MA

12 <sup>#b</sup> Current address: Medical Scientist Training Program, Washington University in St.  
13 Louis School of Medicine, St. Louis, MO

14  
15  
16  
17

18 \* Co-corresponding authors

19 E-mail: [rlamason@mit.edu](mailto:rlamason@mit.edu), [welch@berkeley.edu](mailto:welch@berkeley.edu)

20

## 21 **Abstract**

22 The rickettsiae are obligate intracellular alphaproteobacteria that exhibit a complex  
23 infectious life cycle in both arthropod and mammalian hosts. As obligate intracellular  
24 bacteria, *Rickettsia* are highly adapted to living inside a variety of host cells, including  
25 vascular endothelial cells during mammalian infection. Although it is assumed that the  
26 rickettsiae produce numerous virulence factors that usurp or disrupt various host cell  
27 pathways, they have been challenging to genetically manipulate to identify the key  
28 bacterial factors that contribute to infection. Motivated to overcome this challenge, we  
29 sought to expand the repertoire of available rickettsial loss-of-function mutants, using an  
30 improved *mariner*-based transposon mutagenesis scheme. Here, we present the  
31 isolation of over 100 transposon mutants in the spotted fever group species *Rickettsia*  
32 *parkeri*. These mutants targeted genes implicated in a variety of pathways, including  
33 bacterial replication and metabolism, hypothetical proteins, the type IV secretion  
34 system, as well as factors with previously established roles in host cell interactions and  
35 pathogenesis. Given the need to identify critical virulence factors, forward genetic  
36 screens such as this will provide an excellent platform to more directly investigate  
37 rickettsial biology and pathogenesis.

## 38 Introduction

39 The *Rickettsia* are a genus of obligate intracellular alphaproteobacteria that are  
40 divided into four groups - the spotted fever group (SFG), typhus group (TG), ancestral  
41 group (AG), and transitional group (TRG) [1]. They inhabit arthropods (ticks, fleas, and  
42 mites), and many can be transmitted to humans and other mammals. Pathogenic  
43 species primarily target endothelial cells in the vasculature, causing a variety of vascular  
44 diseases such as typhus and Rocky Mountain spotted fever [2]. Despite the prevalence  
45 of rickettsial diseases throughout the world, we know little about the bacterial factors  
46 required for infection and pathogenesis.

47 The SFG species *Rickettsia parkeri*, a tick-borne pathogen that causes a mild  
48 form of spotted fever in humans [3,4], is emerging as a model organism to study SFG  
49 rickettsial pathogenesis. *R. parkeri* can be studied under BL2 conditions and has animal  
50 models of pathogenesis that mimic aspects of human infection [5,6]. Furthermore, the  
51 *R. parkeri* life cycle closely matches that of the more virulent SFG species *R. rickettsii*  
52 [7,8], the causative agent of Rocky Mountain spotted fever. Like its more virulent  
53 relative, *R. parkeri* invades non-phagocytic cells and is taken into a primary phagocytic  
54 vacuole [9]. They then break out of this vacuole and enter the cytosol to replicate and  
55 grow [10]. *R. parkeri* and many other *Rickettsia* species also hijack the host cell actin  
56 cytoskeleton to polymerize actin tails and undergo actin-based motility [11-13]. During  
57 spread, motile *R. parkeri* move to a host cell-cell junction but then lose their actin tails  
58 before entering into a short (~1  $\mu\text{m}$ ) plasma membrane protrusion that is subsequently  
59 engulfed into the neighboring cell. The bacterium then lyses the double-membrane  
60 secondary vacuole to enter the neighboring cell cytosol and begin the process again

61 [14]. Because of its experimental tractability and the fact that its lifecycle is  
62 indistinguishable from more virulent species, *R. parkeri* provides an attractive system for  
63 investigating rickettsial host-pathogen interactions.

64 As an obligate intracellular pathogen, *R. parkeri* must produce virulence factors  
65 that usurp or disrupt various host cell pathways. However, due to their obligate growth  
66 requirement, it has been challenging to genetically manipulate the rickettsiae to identify  
67 the key bacterial factors that contribute to infection [15]. Fortunately, recent advances  
68 have expanded the genetic toolkit that can be used in the rickettsiae, allowing us to  
69 more directly peer into the molecular mechanisms that drive rickettsial biology. Chief  
70 among these advances was the development of a *Himar1 mariner*-based transposon  
71 system for random mutagenesis of rickettsial genomes [16]. To date, smaller-scale  
72 mutagenesis studies have been completed in the TG species *R. prowazekii* [16-18] and  
73 the SFG species *R. rickettsii* [18,19].

74 Despite these advances, we still do not know all of the critical bacterial factors  
75 that mediate interactions with the host. Moreover, many of the genes in *R. parkeri* are  
76 annotated to encode hypothetical proteins, which limits our ability to rationally explore  
77 their functions. Therefore, we set out to expand the repertoire of available *R. parkeri*  
78 mutants using a forward genetic screen. We used the *mariner*-based transposon  
79 system [16] and developed a more streamlined protocol to rapidly isolate *R. parkeri*  
80 mutants that alter plaque size. To date, we have isolated over 100 mutants that disrupt  
81 genes predicted to function in a variety of pathways. We have previously published our  
82 detailed analysis of three mutants – in *sca2*, *rickA*, and *sca4* [14,20]. Here, we present

83 the full panel of mutants to demonstrate the potential and ease of developing rickettsial  
84 transposon libraries.

85

## 86 **Materials and methods**

### 87 **Cell lines**

88 Vero cells (monkey, kidney epithelial) were obtained from the University of  
89 California, Berkeley tissue culture facility and grown in Dulbecco's modified Eagle's  
90 medium (DMEM) (Invitrogen) containing 5% fetal bovine serum (FBS) at 37°C in 5%  
91 CO<sub>2</sub>.

92

### 93 **Transposon mutagenesis in *R. parkeri***

94 *R. parkeri* Portsmouth strain was a gift from Dr. Chris Paddock (Centers for  
95 Disease Control and Prevention). Wild-type *R. parkeri* were expanded and purified by  
96 centrifugation through a 30% MD-76R solution, as previously described [14]. The  
97 pMW1650 plasmid carrying the *Himar1 mariner*-based transposon [16] (a gift from Dr.  
98 David Wood, University of South Alabama) was used to generate *R. parkeri* strains  
99 carrying transposon insertions. To isolate small plaque mutants, a small-scale  
100 electroporation protocol was designed. First, a T75 cm<sup>2</sup> flask of confluent Vero cells was  
101 infected with approximately 10<sup>7</sup> WT *R. parkeri*. Three days post-infection, when Vero  
102 cells were at least 90% rounded, they were scraped from the flask. Infected cells were  
103 spun down for 5 min at 1800 x g at 4°C and resuspended in 3-6 ml K-36 buffer. To  
104 mechanically disrupt infected cells and release bacteria, cells were either passed

105 through a 27.5 gauge syringe needle 10 times, or vortexed at ~2900 rpm using a Vortex  
106 Genie 2 (Scientific Industries Inc.) in a 15 ml conical tube containing 2 g of 1 mm glass  
107 beads, with two 30 s pulses and 30 s incubations in ice after each pulse. This bead  
108 disruption procedure was adopted for a majority of the screen because it was faster and  
109 reduced the possibility of a needle stick. Host cell debris was pelleted for 5 min at 200 x  
110 g at 4°C. The supernatant containing *R. parkeri* was transferred to 1.5 ml  
111 microcentrifuge tubes and spun for 2 min at 9000 x g at 4°C. The bacterial pellets were  
112 then washed three times in cold 250 mM sucrose, resuspended in 50 µl cold 250 mM  
113 sucrose, mixed with 1 µg of pMW1650 plasmid, placed in a 0.1 cm cuvette, and  
114 electroporated at 1.8 kV, 200 ohms, 25 µF, 5 ms using a Gene Pulser Xcell (Bio-Rad).  
115 Bacteria were immediately recovered in 1.2 ml brain heart infusion (BHI) media. To  
116 infect confluent Vero cells in 6-well plates, media was removed from each well, and  
117 cells were washed with phosphate-buffered saline (PBS). 100 µl of electroporated  
118 bacteria was added per well, and plates were placed in a humidified chamber and  
119 rocked for 30 min at 37°C. An overlay of DMEM with 5% FBS and 0.5% agarose was  
120 added to each well. Infected cells were incubated at 33°C, 5% CO<sub>2</sub> for 24 h at which  
121 point a second overlay was added containing rifampicin (Sigma) to a final concentration  
122 200 ng/ml to select for transformants. After at least 3 or 4 d, plaques were visible by eye  
123 in the cell monolayer, and plaques smaller or bigger relative to neighboring plaques  
124 were selected for further analysis.

125 To isolate and amplify mutant strains and map the sites of transposon insertion,  
126 plaques were picked and resuspended in 200 µl of BHI. Media was aspirated from  
127 confluent Vero cells in 6-well plates, and the isolated plaque resuspension was used to

128 infect the cells at 37°C for 30 min with rocking. Then 3 ml DMEM with 2% FBS and 200  
129 ng/ml rifampicin was added to each well, and infections progressed until monolayers  
130 were fully infected. Infected cells were isolated as described above using mechanical  
131 disruption, except that bacteria were immediately resuspended in BHI without a sucrose  
132 wash and stored at -80°C.

133

### 134 **Semi-random nested PCR**

135 To map the transposon insertion sites, plaque-purified *R. parkeri* strains were  
136 boiled for 10 min and used as templates for PCR reactions. Genomic DNA at insertion  
137 sites was amplified for sequencing using semi-random nested PCR. The first “external”  
138 PCR reaction used transposon-specific primers (ExTn1 5’-  
139 CACCAATTGCTAAATTAGCTTTAGTTCC-3’; or ExTn2 5’-  
140 GTGAGCTATGAGAAAGCGCCACGC-3’) and a universal primer (Univ1 5’-  
141 GCTAGCGGCCGCGACTAGTCGANNNNNNNNNCTTCT-3’). This yielded the  
142 “external” PCR product that served as a template in the subsequent “internal” PCR  
143 reaction using transposon-specific primers (InTn1 5’-  
144 GCTAGCGGCCGCGGTCCTTGTACTTGTGTTTATAATTATCATGAG-3’; or InTn2 5’-  
145 GCTAGCGGCCGCGCCTGGTATCTTTATAGTCCTGTCCG-3’) and a different universal  
146 primer (Univ2 5’-GCTAGCGGCCGCGACTAGTCGA-3’). PCR products were cleaned  
147 using ExoSAP-IT PCR Product Cleanup Reagent (Affymetrix) and sequenced using  
148 primers SR095 5’-CGCCACCTCTGACTTGAGCGTCG-3’ and SR096 5’-  
149 CCATATGAAAACACTCCAAAAAAC-3’. Genomic locations were determined using  
150 BLAST against the *R. parkeri* strain Portsmouth genome (GenBank/NCBI accession

151 NC\_017044.1).

152

## 153 **Results**

### 154 **Design of an improved transposon mutagenesis scheme**

155 We used the pMW1650 plasmid, which carries a *Himar1 mariner*-based  
156 transposon [16], to randomly mutate the *R. parkeri* genome. pMW1650 encodes the  
157 *Himar1* transposase, a transposon cassette that contains the *R. prowazekii arr-2*  
158 rifampin resistance gene, and a variant of green fluorescent protein (GFPuv) [16] (Fig  
159 1A). The first reported application of this system in *R. prowazekii* [16] and *R. rickettsii*  
160 [18] yielded some transposon mutants, but we sought to improve the mutagenesis  
161 scheme to increase the chances of identifying genes important for infection. Therefore,  
162 we developed a simple and rapid procedure to extract bacteria from infected host cells.  
163 In the past, we had purified *R. parkeri* from infected host cells using an hours-long  
164 process involving mechanical disruption and density gradient centrifugation prior to  
165 electroporation [21]. We designed a new procedure to isolate and electroporate bacteria  
166 and re-infect host cells in under an hour. To mechanically disrupt infected cells, we  
167 either passed infected cells through syringe needle or vortexed cells in the presence of  
168 1 mm glass beads. Samples were then spun at low speed for 5 min to pellet host cell  
169 debris, followed by a 2 min high-speed spin to pellet bacteria. *Rickettsia* were then  
170 quickly washed 2-3 times in cold sucrose prior to electroporation.

171



172 **Fig 1. Transposon mutagenesis of *R. parkeri*.** (A) Map of the pMW1650 plasmid  
173 used in this study for transposon mutagenesis (IR, inverted repeats). (B) Experimental  
174 scheme for transposon mutagenesis and isolation of individual mutants.

175

176 To identify genes involved in infection, we screened for transformants that  
177 showed altered plaque size and/or morphology (Fig 1B). We predicted that plaque size  
178 changes would result from defects at different stages of the rickettsial life cycle,  
179 including in intracellular growth, replication, motility, and/or spread. To screen for such  
180 mutants, pMW1650-electroporated bacteria were immediately used to setup plaque  
181 assays in the presence of rifampicin to select for transformants. Plaque size was  
182 monitored visually over the course of 3-9 days, and those displaying a small plaque (Sp)  
183 or big plaque (Bp) phenotype relative to their neighbors were selected for expansion.  
184 After independently repeating this process 7 times, 120 Sp mutant and 2 Bp mutants  
185 were selected for further analysis, as detailed below.

186

## 187 **Expansion and mapping of the transposon mutants**

188 To expand the isolated transformants, plaques were picked and transferred to  
189 uninfected host cells to propagate each bacterial strain. Once the host cells were >75%  
190 infected, *Rickettsia* were purified using the rapid isolation procedure outlined above.  
191 Nine isolates did not grow in this expansion procedure, possibly due to a lack of live  
192 bacteria in the original plaque or poor isolation of the infected cells. The remaining  
193 transformants could be expanded, and for these the transposon insertion site was  
194 mapped using a semi-random nested PCR protocol. In short, the junctions between the

195 transposon and the flanking genomic regions were amplified via two nested PCR  
196 reactions using transposon-specific and universal primers (Fig 1C). PCR products were  
197 sent directly for sequencing. Mapping of the transposon insertion sites to the *R. parkeri*  
198 chromosome (accession number CP003341) revealed no preference for specific  
199 regions (Fig 1D), similar to what was observed in *R. rickettsii* [18,19] and *R. prowazekii*  
200 [16,18]. Using this procedure, we identified the transposon insertion sites for 106  
201 mutants. For 6 isolates the transposon insertion site could not be mapped, and the  
202 strains did not express GFP<sub>uv</sub> (data not shown), suggesting these were spontaneous  
203 rifampicin-resistant strains. Of the 106 transposon mutations mapped, 81 were within  
204 the coding regions of 75 distinct genes and 25 were in intergenic regions (Table 1).  
205 Mutants of interest (Sp2, Sp34, and Sp19) were further purified and expanded for  
206 detailed analysis, as previously reported [14,20]. Our results indicate that transposon  
207 mutagenesis can be readily adapted for large-scale forward genetic screening to study  
208 gene function in *R. parkeri*.

209  
210 **Fig 2. Mapping the transposon insertion sites.** (A) Diagram showing the insertion of  
211 the transposon cassette into a chromosomal region (in grey). Primers specific to the  
212 transposon ends were paired with universal primers to amplify the chromosome-  
213 transposon junctions (red triangles), using semi-random nested PCR. Two nested PCR  
214 reactions were done to improve amplification of the chromosome-transposon junction  
215 directly from boiled bacteria. (B) *R. parkeri* chromosomal map showing all transposon  
216 insertion sites (see red lines) identified in this screen.

217

218 **Table 1.** Transposon insertion sites in *R. parkeri*

| Name | Insertion site  | Gene symbol  | Gene product description                               |
|------|-----------------|--------------|--------------------------------------------------------|
| Sp1  | 101427          | MC1_00610    | Putative cytoplasmic protein                           |
| Sp2  | 112315          | MC1_00650 ** | Surface cell antigen 2 (Sca2)                          |
| Sp3  | 681322-681323   | MC1_03895    | Single-stranded-DNA-specific exonuclease RecJ          |
| Sp6  | 365840          | MC1_02010    | Cytochrome c1, heme protein                            |
| Sp7  | 670632          | MC1_03810    | Folypolyglutamate synthase                             |
| Sp8  | 1047805-1047806 | Intergenic   | n/a                                                    |
| Sp9  | 151196-151197   | MC1_00820    | VirB6 Type IV secretory pathway (rvhB6e)               |
| Sp10 | 491813          | Intergenic   | n/a                                                    |
| Sp11 | 1136147         | MC1_06660    | DNA polymerase I                                       |
| Sp13 | 563189-563190   | MC1_03195    | RND efflux transporter                                 |
| Sp14 | 518698-518699   | MC1_02960    | CTP synthetase                                         |
| Sp15 | 520939          | MC1_02980    | Hypothetical protein                                   |
| Sp17 | 1248850-1248851 | MC1_07220    | Transcriptional regulator                              |
| Sp18 | 70364           | MC1_00450    | Hypothetical protein                                   |
| Sp19 | 654506-654507   | MC1_03740    | Antigenic heat-stable 120 kDa protein (Sca4)           |
| Sp20 | 531536          | MC1_03025 ** | ampG protein                                           |
| Sp21 | 20179           | Intergenic   | n/a                                                    |
| Sp22 | 29609           | MC1_00175    | F0F1 ATP synthase subunit B                            |
| Sp23 | 474265          | MC1_02665    | Outer membrane assembly protein                        |
| Sp24 | 753916          | Intergenic   | n/a                                                    |
| Sp25 | 728290          | MC1_04100    | Isopentenyl pyrophosphate isomerase                    |
| Sp26 | 33338           | MC1_00210    | Transcriptional regulator                              |
| Sp27 | 30722           | Intergenic   | n/a                                                    |
| Sp28 | 301811          | MC1_01650    | Protease                                               |
| Sp29 | 225255          | MC1_01180    | Acriflavin resistance protein D                        |
| Sp30 | 886852          | Intergenic   | n/a                                                    |
| Sp31 | 262955-262956   | MC1_01410    | Hypothetical protein                                   |
| Sp33 | 299510          | MC1_01640    | Putative toxin of toxin-antitoxin (TA) system          |
| Sp34 | 888003          | MC1_05085 ** | Actin polymerization protein RickA                     |
| Sp35 | 589425          | MC1_03370    | Thiol:disulfide interchange protein dsbA               |
| Sp36 | 230327          | MC1_01215    | Prolyl endopeptidase                                   |
| Sp37 | 637085          | MC1_03670    | Hypothetical protein                                   |
| Sp38 | 292360-292361   | MC1_01595    | S-adenosylmethionine:tRNA ribosyltransferase-isomerase |
| Sp39 | 912985          | MC1_05235    | Hypothetical protein (RARP-2)                          |
| Sp40 | 1279632         | Intergenic   | n/a                                                    |
| Sp41 | 995818          | Intergenic   | n/a                                                    |
| Sp42 | 372020          | MC1_02055 ** | GTP-binding protein LepA                               |
| Sp43 | 651603-651604   | MC1_03735    | ADP, ATP carrier protein                               |
| Sp44 | 868641          | MC1_04970    | HAD-superfamily hydrolase                              |
| Sp45 | 761156          | MC1_04295    | Microcin C7 resistance protein                         |
| Sp46 | 852817          | MC1_04870    | Methylated-DNA-protein-cysteine methyltransferase      |
| Sp47 | 856486          | MC1_04920    | Hypothetical protein                                   |
| Sp48 | 243782-243780   | MC1_01300    | DNA repair protein RecN                                |
| Sp49 | 687339          | MC1_03930    | Hypothetical protein                                   |

|       |                 |              |                                                              |
|-------|-----------------|--------------|--------------------------------------------------------------|
| Sp50  | 1158028         | MC1_06730    | Hypothetical protein                                         |
| Sp51  | 888088          | MC1_05085 ** | Actin polymerization protein RickA                           |
| Sp52  | 346470          | Intergenic   | n/a                                                          |
| Sp53  | 793762          | MC1_04525    | Hypothetical protein                                         |
| Sp54  | 1258878         | MC1_07285    | Hypothetical protein                                         |
| Sp55  | 1245896         | MC1_07200    | tig Trigger factor                                           |
| Sp56  | 1243741-1243742 | Intergenic   | n/a                                                          |
| Sp57  | 1004249-1004250 | Intergenic   | n/a                                                          |
| Sp58  | 1273429         | MC1_07360    | NAD(P) transhydrogenase subunit alpha                        |
| Sp59  | 1181227         | Intergenic   | n/a                                                          |
| Sp60  | 1158028         | MC1_01115    | Hypothetical protein                                         |
| Sp62  | 350030-350031   | MC1_01915    | Cytochrome c oxidase assembly protein                        |
| Sp63  | 109070          | MC1_00650 ** | Surface cell antigen (Sca2)                                  |
| Sp64  | 314932          | MC1_01745 ** | Ankyrin repeat-containing protein (RARP-1)                   |
| Sp65  | 726967          | Intergenic   | n/a                                                          |
| Sp66  | 615509-615510   | MC1_03545    | Hypothetical protein                                         |
| Sp71  | 371351          | MC1_02055 ** | GTP-binding protein LepA                                     |
| Sp72  | 83786           | MC1_00525    | Stage 0 sporulation protein J                                |
| Sp73  | 655844          | MC1_03745    | Putative transcriptional regulator                           |
| Sp74  | 991759-991760   | MC1_05745    | Hypothetical protein                                         |
| Sp75  | 251100          | MC1_01335    | Ankyrin repeat-containing protein                            |
| Sp76  | 9674            | Intergenic   | n/a                                                          |
| Sp78  | 672659          | Intergenic   | n/a                                                          |
| Sp79  | 65481           | Intergenic   | n/a                                                          |
| Sp80  | 1210788-1210789 | MC1_07040    | Outer membrane protein OmpA                                  |
| Sp81  | 365135          | MC1_02000    | Cytochrome b                                                 |
| Sp82  | 549578-549579   | MC1_03115    | Cytochrome c oxidase polypeptide                             |
| Sp83  | 480829          | MC1_02715    | Hypothetical protein                                         |
| Sp84  | 689140          | Intergenic   | n/a                                                          |
| Sp85  | 514488          | Intergenic   | n/a                                                          |
| Sp88  | 241435          | MC1_01295    | Thermostable carboxypeptidase                                |
| Sp90  | 1127301         | MC1_06610    | Hypothetical protein                                         |
| Sp91  | 82796           | MC1_00515    | 16S rRNA methyltransferase GidB                              |
| Sp92  | 1229489-1229490 | MC1_07110    | 17 kDa surface antigen                                       |
| Sp93  | 1223170         | MC1_07070    | Undecaprenyl-phosphate alpha-N-acetylglucosaminyltransferase |
| Sp94  | 774831          | Intergenic   | n/a                                                          |
| Sp95  | 902617          | MC1_05150    | Patatin b1                                                   |
| Sp96  | 561640-561641   | MC1_03180    | Hypothetical protein                                         |
| Sp97  | 641129-641130   | MC1_03685    | miaA tRNA delta(2)-isopentenylpyrophosphate transferase      |
| Sp98  | 34100-34101     | MC1_00220    | Putative methyltransferase                                   |
| Sp99  | 1104365         | Intergenic   | n/a                                                          |
| Sp100 | 375061          | Intergenic   | n/a                                                          |
| Sp101 | 152889-152890   | Intergenic   | n/a                                                          |
| Sp102 | 406474-406475   | MC1_02260    | DNA mismatch repair protein MutS                             |
| Sp103 | 662735          | MC1_03780    | Hypothetical protein                                         |
| Sp104 | 1161553         | MC1_06745    | Hypothetical protein                                         |

|       |                 |              |                                            |
|-------|-----------------|--------------|--------------------------------------------|
| Sp105 | 593543-593544   | MC1_03405    | Acylamino acid-releasing protein           |
| Sp106 | 1045462-1045463 | MC1_06065    | Outer membrane protein OmpB                |
| Sp107 | 531709          | MC1_03025 ** | ampG protein                               |
| Sp108 | 1177263         | MC1_06810    | F0F1 ATP synthase subunit beta             |
| Sp109 | 54288-54289     | MC1_00370 ** | Chaperone ClpB                             |
| Sp111 | 854916          | Intergenic   | n/a                                        |
| Sp112 | 55657           | MC1_00370 ** | Chaperone ClpB                             |
| Sp113 | 319455          | MC1_01760    | Histidine kinase sensor protein            |
| Sp114 | 765596          | MC1_04335    | Ribonuclease D                             |
| Sp115 | 229548          | Intergenic   | n/a                                        |
| Sp116 | 314408          | MC1_01745 ** | Ankyrin repeat-containing protein (RARP-1) |
| Sp117 | 733347          | MC1_04135    | Hypothetical protein                       |
| Sp118 | 695571          | Intergenic   | n/a                                        |
| Sp119 | 231259          | MC1_01235    | Prolyl endopeptidase                       |
| Sp120 | 27839           | MC1_00155    | Hypothetical protein                       |
| Bp2   | 756531          | MC1_04275    | Hypothetical protein                       |

219 Spontaneous rifampicin resistant mutants: Sp4-5, 69-70, 86, Bp1. Clones that did not expand: Sp16, 32,  
220 61, 67-68, 77, 87, 89, 110. Mapping for Sp12 revealed two different insertion sites and was not included  
221 in the above list. \*\* Indicates more than one isolated transposon mutant/gene. n/a, not applicable.

222

## 223 Discussion

224 A critical barrier to identifying and characterizing virulence factors in obligate  
225 intracellular bacterial pathogens has been the inability to easily manipulate their  
226 genomes. In this study, we sought to overcome this barrier and harness recent  
227 advances in rickettsial genetics to build a library of transposon mutants of the SFG  
228 *Rickettsia* species, *R. parkeri*. We streamlined previous protocols to more efficiently  
229 introduce a *mariner*-based transposon into the *R. parkeri* genome and isolated 106  
230 independent transposon insertion mutations. Our study represents the first such  
231 transposon mutant library in this species, and the most extensive reported library in the  
232 rickettsiae.

233 In our study, we selected for mutants that showed an altered plaque size  
234 phenotype in infected host cell monolayers. Transposon mutations may cause a small  
235 plaque phenotype due to any number of defects, including: poor bacterial replication,  
236 reduced access to or survival within the cytosol, impaired cytosolic actin-based motility,  
237 and defective cell-to-cell spread. It was thus not surprising that we identified genes with  
238 a diverse set of predicted functions. Many genes with products predicted to perform  
239 bacterial-intrinsic functions (e.g. DNA replication) were identified and are expected to  
240 indirectly influence host-pathogen interactions through their role in bacterial growth and  
241 division. Other genes had more direct connections to the infectious life cycle and were  
242 further characterized in our recent studies to reveal their specific functions in  
243 intracellular infection [14,20]. For example, we previously described transposon  
244 mutations that disrupt the *rickA* (Sp34) and *sca2* (Sp2) genes and showed that these  
245 gene products are required for two independent phases of *R. parkeri* actin-based  
246 motility [20]. We also identified a transposon insertion (Sp19) in *sca4* gene and showed  
247 this encodes a secreted effector that promotes cell-to-cell spread [14].

248 Other genes mutated in this screen have been suggested to play critical roles  
249 during the infectious life cycle of other *Rickettsia* species but have yet to be  
250 characterized in *R. parkeri*. For example, we isolated transposon insertion mutants in  
251 the *ompA* (Sp80) and *ompB* (Sp106) genes, encoding the outer membrane proteins  
252 OmpA and OmpB. Work with SFG species *R. conorii* and *R. rickettsii* showed that  
253 OmpA and OmpB may regulate adhesion to and/or invasion of host cells [22-25].  
254 However, some of this work relied on expression of these proteins in other bacterial  
255 species because mutants were not available. Interestingly, targeted knockout of *ompA*

256 in *R. rickettsii* via an LtrA group II intron retrohoming system revealed no clear  
257 requirement for OmpA in invasion [26], suggesting it alone is not necessary. This  
258 highlights the importance of studying loss-of-function mutants to reveal gene function.  
259 The fact that *ompA* and *ompB* mutants exhibit a small plaque phenotype suggest  
260 additional functions of these proteins, putative indirect effects of the truncated products,  
261 or simply a need for efficient invasion of neighboring cells after host cells lyse during  
262 plaque development. Future work on these mutants should help reveal the relative  
263 importance of these proteins during invasion and/or other stages of the *R. parkeri* life  
264 cycle.

265 Our screen also revealed genes for which no specific role has been ascribed  
266 during the infectious life cycle, although the sequence of their protein products suggests  
267 a role in interaction with host cells. These proteins include some with eukaryotic-like  
268 motifs such as ankyrin repeats, which often mediate protein-protein interactions [27],  
269 and are a common motif in secreted bacterial effector proteins or virulence factors that  
270 target host pathways [27,28]. In particular, mutations in genes encoding *R. parkeri*  
271 orthologs of RARP-1 and RARP-2 from *R. typhi* (accession numbers MC1\_01745 and  
272 MC1\_05235, respectively) were identified in our screen (Sp64, Sp116, and Sp39). Work  
273 in *R. typhi* has revealed that RARP-1 and RARP-2 are secreted into the host cell, but  
274 their precise functions remain unknown [29,30].

275 Another mystery in rickettsial biology relates to the functional importance of the  
276 putative type IV secretion system (T4SS) encoded in their genomes [31], which in other  
277 species is involved in translocating DNA, nucleoproteins, and effector proteins into host  
278 cells [32]. Strikingly, the *Rickettsia* T4SS has an unusual expansion of the VirB6-like



279 genes (i.e. *Rickettsiales vir* homolog, *rvhB6*), which are predicted to encode inner  
280 membrane protein components at the base of the T4SS [30,31,33]. Interestingly, we  
281 isolated a strain with a transposon insertion mutation in the fifth *VirB6*-like gene, *rvhB6e*  
282 (Sp9). This mutant will prove useful to explore the function of the T4SS in rickettsial  
283 infection.

284 Finally, we identified 20 strains, each carrying a transposon insertion disrupting a  
285 gene encoding a hypothetical protein. One of these caused a big plaque phenotype,  
286 suggesting enhanced growth or cell-to-cell spread. Further study of these mutants has  
287 the potential to reveal the function of these uncharacterized gene productions during  
288 rickettsial infection.

289 Overall, our mutant collection provides an important resource that can be used to  
290 uncover key bacterial players that regulate rickettsial interactions with their host cells.  
291 By streamlining the ease of mutant isolation as described here, investigators can begin  
292 expanding the available toolkit to generate more *Rickettsia* mutants. This will also allow  
293 for more direct analysis of gene function in the rickettsiae without the reliance on  
294 introducing genes into heterologous organisms. This forward genetics approach has the  
295 potential to reveal new insights into rickettsial biology and pathogenesis; however,  
296 limitations remain. For example, because the rickettsiae are obligate intracellular  
297 pathogens, screens such as these are unlikely to reveal genes that are essential for  
298 invasion or intracellular growth. Therefore, we cannot necessarily assess the relative  
299 importance of genes not identified in forward genetic screens. Additionally, the reported  
300 protocol still has limits with regard to electroporation efficiency and recovery on host  
301 cells, which makes it harder to adapt for large-scale mutagenesis work. Further



302 advancements in rickettsial genetic methods will be necessary to complement our work  
303 and more effectively probe the molecular mechanisms of all genes whose products may  
304 control critical host-pathogen interactions.

305

## 306 **Acknowledgments**

307 We thank David Wood and Chris Paddock for plasmids and strains and Shawna Reed  
308 for technical help. We also thank the staff of UC Berkeley's Cell Culture Facility and  
309 DNA Sequencing Facility for critical experimental support. R.L.L. was supported by a  
310 Helen Hay Whitney Foundation postdoctoral fellowship and NIH/NIGMS grant K99  
311 GM115765. M.D.W. is supported by NIH/NIAID grant R01 AI109044.

312

## 313 **References**

- 314 1. Gillespie JJ, Williams K, Shukla M, Snyder EE, Nordberg EK, Ceraul SM, et al.  
315 *Rickettsia* phylogenomics: unwinding the intricacies of obligate intracellular life.  
316 PLoS ONE. 2008;3: e2018. doi:10.1371/journal.pone.0002018
- 317 2. Walker DH, Ismail N. Emerging and re-emerging rickettsioses: endothelial cell  
318 infection and early disease events. Nat Rev Microbiol. 2008;6: 375–386.  
319 doi:10.1038/nrmicro1866
- 320 3. Paddock CD, Sumner JW, Comer JA, Zaki SR, Goldsmith CS, Goddard J, et al.  
321 *Rickettsia parkeri*: a newly recognized cause of spotted fever rickettsiosis in the  
322 United States. Clin Infect Dis. 2004;38: 805–811. doi:10.1086/381894

- 323 4. Paddock CD, Finley RW, Wright CS, Robinson HN, Schrodt BJ, Lane CC, et al.  
324 *Rickettsia parkeri* rickettsiosis and its clinical distinction from Rocky Mountain  
325 spotted fever. Clin Infect Dis. 2008;47: 1188–1196. doi:10.1086/592254
- 326 5. Grasperge BJ, Reif KE, Morgan TD, Sunyakumthorn P, Bynog J, Paddock CD, et  
327 al. Susceptibility of inbred mice to *Rickettsia parkeri*. Infect Immun. 2012;80:  
328 1846–1852. doi:10.1128/IAI.00109-12
- 329 6. Banajee KH, Embers ME, Langohr IM, Doyle LA, Hasenkampf NR, Macaluso KR.  
330 *Amblyomma maculatum* feeding augments *Rickettsia parkeri* infection in a rhesus  
331 macaque model: A pilot study. PLoS ONE. 2015;10: e0135175.  
332 doi:10.1371/journal.pone.0135175
- 333 7. Ray K, Marteyn B, Sansonetti PJ, Tang CM. Life on the inside: the intracellular  
334 lifestyle of cytosolic bacteria. Nat Rev Microbiol. 2009;7: 333–340.  
335 doi:10.1038/nrmicro2112
- 336 8. Lamason RL, Welch MD. Actin-based motility and cell-to-cell spread of bacterial  
337 pathogens. Curr Opin Microbiol. 2017;35: 48–57. doi:10.1016/j.mib.2016.11.007
- 338 9. Reed SCO, Serio AW, Welch MD. *Rickettsia parkeri* invasion of diverse host cells  
339 involves an Arp2/3 complex, WAVE complex and Rho-family GTPase-dependent  
340 pathway. Cell Microbiol. 2012;14: 529–545. doi:10.1111/j.1462-  
341 5822.2011.01739.x
- 342 10. Welch MD, Reed SCO, Haglund CM. Establishing intracellular infection: escape  
343 from the phagosome and intracellular colonization (rickettsiaceae). In: Palmer GH,

- 344 Azad AF, editors. Washington DC: Intracellular Pathogens II: Rickettsiales; 2012.  
345 pp. 154–174. doi:10.1128/9781555817336.ch5
- 346 11. Heinzen RA, Hayes SF, Peacock MG, Hackstadt T. Directional actin  
347 polymerization associated with spotted fever group *Rickettsia* infection of Vero  
348 cells. *Infect Immun.* 1993;61: 1926–1935.
- 349 12. Serio AW, Jeng RL, Haglund CM, Reed SC, Welch MD. Defining a core set of  
350 actin cytoskeletal proteins critical for actin-based motility of *Rickettsia*. *Cell Host*  
351 *Microbe.* 2010;7: 388–398. doi:10.1016/j.chom.2010.04.008
- 352 13. Choe JE, Welch MD. Actin-based motility of bacterial pathogens: mechanistic  
353 diversity and its impact on virulence. Carbonetti N, editor. *Pathog Dis.* 2016;74:  
354 ftw099. doi:10.1093/femspd/ftw099
- 355 14. Lamason RL, Bastounis E, Kafai NM, Serrano R, Del Álamo JC, Theriot JA, et al.  
356 *Rickettsia Sca4* reduces vinculin-mediated intercellular tension to promote  
357 spread. *Cell.* 2016;167: 670–683.e10. doi:10.1016/j.cell.2016.09.023
- 358 15. McClure EE, Chávez ASO, Shaw DK, Carlyon JA, Ganta RR, Noh SM, et al.  
359 Engineering of obligate intracellular bacteria: progress, challenges and  
360 paradigms. *Nat Rev Microbiol.* 2017;15: 544–558. doi:10.1038/nrmicro.2017.59
- 361 16. Liu Z-M, Tucker AM, Driskell LO, Wood DO. Mariner-based transposon  
362 mutagenesis of *Rickettsia prowazekii*. *Appl Environ Microbiol.* 2007;73: 6644–  
363 6649. doi:10.1128/AEM.01727-07

- 364 17. Qin A, Tucker AM, Hines A, Wood DO. Transposon mutagenesis of the obligate  
365 intracellular pathogen *Rickettsia prowazekii*. Appl Environ Microbiol. 2004;70:  
366 2816–2822.
- 367 18. Clark TR, Lackey AM, Kleba B, Driskell LO, Lutter EI, Martens C, et al.  
368 Transformation frequency of a mariner-based transposon in *Rickettsia rickettsii*.  
369 2011;193: 4993–4995. doi:10.1128/JB.05279-11
- 370 19. Kleba B, Clark TR, Lutter EI, Ellison DW, Hackstadt T. Disruption of the *Rickettsia*  
371 *rickettsii* Sca2 autotransporter inhibits actin-based motility. Infect Immun. 2010;78:  
372 2240–2247. doi:10.1128/IAI.00100-10
- 373 20. Reed SCO, Lamason RL, Risca VI, Abernathy E, Welch MD. *Rickettsia* actin-  
374 based motility occurs in distinct phases mediated by different actin nucleators.  
375 Curr Biol. 2014;24: 98–103. doi:10.1016/j.cub.2013.11.025
- 376 21. Welch MD, Reed SCO, Lamason RL, Serio AW. Expression of an epitope-tagged  
377 virulence protein in *Rickettsia parkeri* using transposon insertion. PLoS ONE.  
378 2012;7: e37310. doi:10.1371/journal.pone.0037310
- 379 22. Uchiyama T. Adherence to and invasion of Vero cells by recombinant *Escherichia*  
380 *coli* expressing the outer membrane protein rOmpB of *Rickettsia japonica*. Ann N  
381 Y Acad Sci. 2003;990: 585–590.
- 382 23. Li H, Walker DH. rOmpA is a critical protein for the adhesion of *Rickettsia rickettsii*  
383 to host cells. Microb Pathog. 1998;24: 289–298. doi:10.1006/mpat.1997.0197

- 384 24. Hillman RD, Baktash YM, Martinez JJ. OmpA-mediated rickettsial adherence to  
385 and invasion of human endothelial cells is dependent upon interaction with  $\alpha 2\beta 1$   
386 integrin. *Cell Microbiol.* 2013;15: 727–741. doi:10.1111/cmi.12068
- 387 25. Chan YGY, Cardwell MM, Hermanas TM, Uchiyama T, Martinez JJ. *Rickettsial*  
388 outer-membrane protein B (rOmpB) mediates bacterial invasion through Ku70 in  
389 an actin, c-Cbl, clathrin and caveolin 2-dependent manner. *Cell Microbiol.*  
390 2009;11: 629–644. doi:10.1111/j.1462-5822.2008.01279.x
- 391 26. Noriea NF, Clark TR, Hackstadt T. Targeted knockout of the *Rickettsia rickettsii*  
392 OmpA surface antigen does not diminish virulence in a mammalian model  
393 system. *MBio.* 2015;6. doi:10.1128/mBio.00323-15
- 394 27. Al-Khodor S, Price CT, Kalia A, Abu Kwaik Y. Functional diversity of ankyrin  
395 repeats in microbial proteins. *Trends Microbiol.* 2010;18: 132–139.  
396 doi:10.1016/j.tim.2009.11.004
- 397 28. Pan X, Lührmann A, Satoh A, Laskowski-Arce MA, Roy CR. Ankyrin repeat  
398 proteins comprise a diverse family of bacterial type IV effectors. *Science.*  
399 2008;320: 1651–1654. doi:10.1126/science.1158160
- 400 29. Kaur SJ, Rahman MS, Ammerman NC, Beier-Sexton M, Ceraul SM, Gillespie JJ,  
401 et al. TolC-dependent secretion of an ankyrin repeat-containing protein of  
402 *Rickettsia typhi*. *J Bacteriol.* 2012;194: 4920–4932. doi:10.1128/JB.00793-12

- 403 30. Gillespie JJ, Kaur SJ, Rahman MS, Rennoll-Bankert K, Sears KT, Beier-Sexton  
404 M, et al. Secretome of obligate intracellular *Rickettsia*. FEMS Microbiol Rev.  
405 2015;39: 47–80. doi:10.1111/1574-6976.12084
- 406 31. Gillespie JJ, Ammerman NC, Dreher-Lesnicks SM, Rahman MS, Worley MJ,  
407 Setubal JC, et al. An anomalous type IV secretion system in *Rickettsia* is  
408 evolutionarily conserved. PLoS ONE. 2009;4: e4833.  
409 doi:10.1371/journal.pone.0004833
- 410 32. Grohmann E, Christie PJ, Waksman G, Backert S. Type IV secretion in Gram-  
411 negative and Gram-positive bacteria. Mol Microbiol. 2018;107: 455–471.  
412 doi:10.1111/mmi.13896
- 413 33. Gillespie JJ, Phan IQH, Driscoll TP, Guillotte ML, Lehman SS, Rennoll-Bankert  
414 KE, et al. The *Rickettsia* type IV secretion system: unrealized complexity mired by  
415 gene family expansion. Mobley H, editor. Pathog Dis. 2016;74: ftw058.  
416 doi:10.1093/femspd/ftw058
- 417

## Figure 1

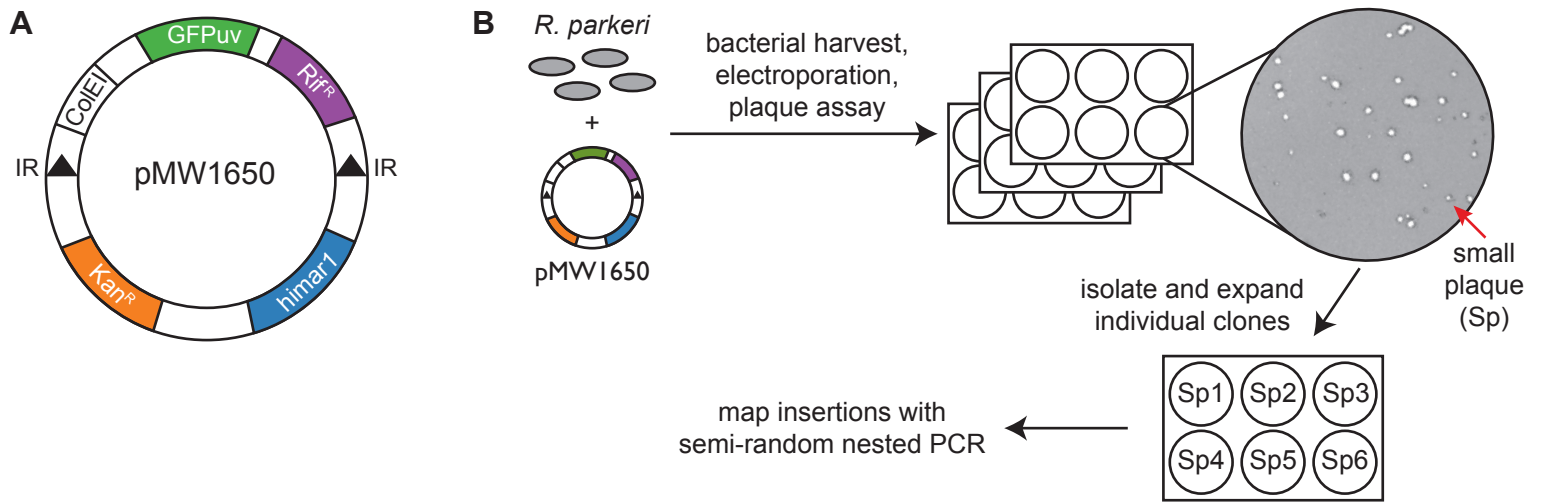

## Figure 2

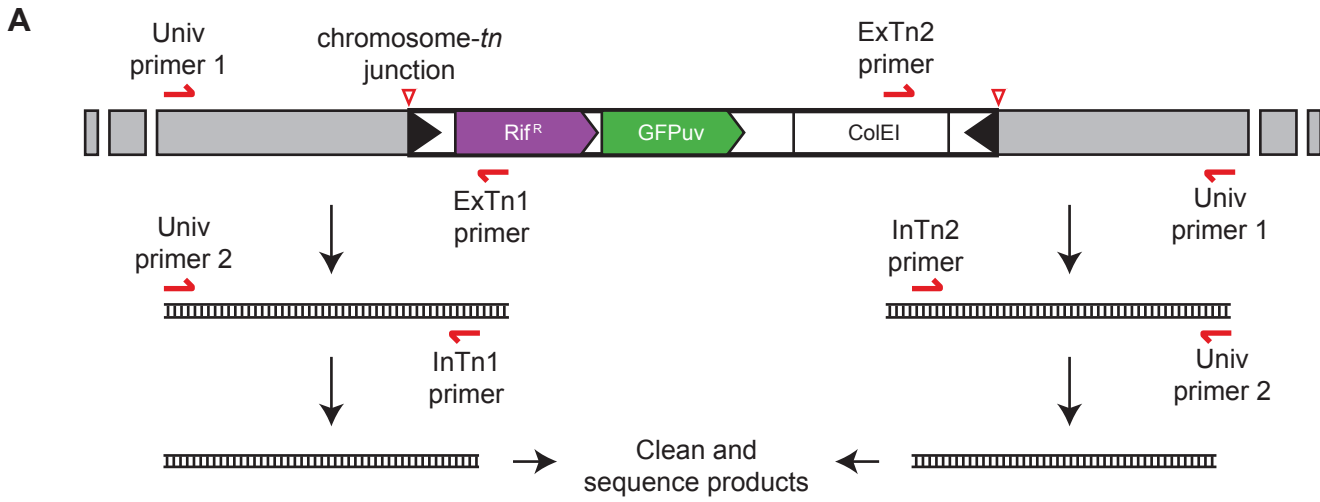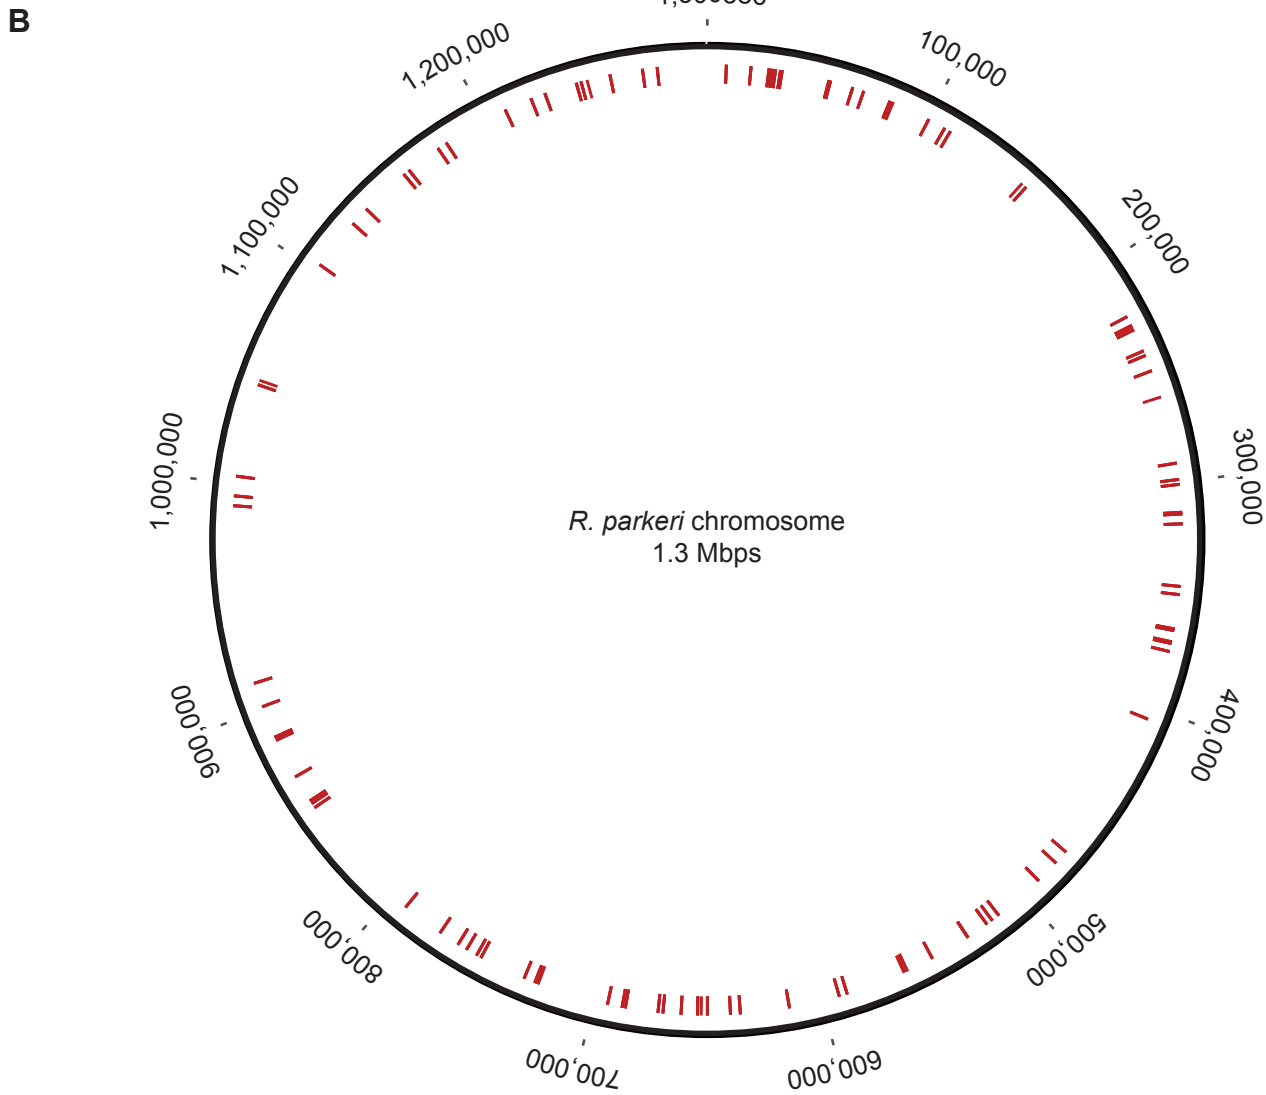

Source: https://www.biorxiv.org/content/10.1101/277160v1.full.pdf
